# Supplementary material for: Effects of Sterilization Cycles on PEEK for Medical Device Application
Source: MDPI journal article supplement (doi:10.3390/bioengineering5010018), 2018-02-21
Supplement: s1 [file s1]

## Supplementary Information

# Effects of Sterilization Cycles on PEEK for Medical Device Application

Amit Kumar <sup>1</sup>, Wai Teng Yap <sup>1</sup>, Soo Leong Foo <sup>1</sup>, and Teck Kheng Lee <sup>1,\*</sup>

<sup>1</sup> College Central, Institute of Technical education, 2 Ang Mo Kio Drive, Singapore 567720; amittontk@gmail.com

\* Correspondence: lee\_teck\_kheng@ite.edu.sg; Tel.: +65-6580 5007

**1. Calculation for number of compression cycles for 1 year (52 weeks) of usage:**

Usage of clip component per week: 2 times

Total usage over 1 year:  $52 \times 2 = 104$  times

Actual pressing of spring per usage: 2 times

Possible pressing of spring outside actual usage: 10 times

Total possible pressing of spring:  $104 \times 12 = 1248$

Safety factor: 5

Design cycles:  $1248 \times 5 = 6240$  times

Declared cycles: 6600 times

**2. Compression cycles after each set of sterilization cycles:**

After each sterilization cycle, component usage: 5 times

Safety factor: 5

Total uses in 10 sterilization cycles:  $10 \times 5 \times 5 = 250$  times
